# Supplementary material for: Meal and Sleep Timing before and during the COVID-19 Pandemic: A Cross-Sectional Anonymous Survey Study from Sweden
Source: MDPI journal article supplement (doi:10.3390/clockssleep3020015), 2021-04-22
Supplement: s1 [file s1]

**Table S1: Exclusions**

| <b>Survey parameter</b>                                                                                                                                                                                                | <b>No (% of all respondents)</b> |
|------------------------------------------------------------------------------------------------------------------------------------------------------------------------------------------------------------------------|----------------------------------|
| Number of respondents who participated in the survey                                                                                                                                                                   | 869 (100)                        |
| Did not answer the meal timing questions                                                                                                                                                                               | -445 (51.2)                      |
| Suffered from diseases that can impact dietary choices (diabetes, cancer, depression, kidney disease, circadian rhythm disorder, myalgic encephalomyelitis, chronic pulmonary disease, stroke, cardiovascular disease) | -54 (6.2)                        |
| Reported regular shift work (outside regular working hours), which can mask the impact of the pandemic on sleep and meal timing                                                                                        | -44 (5.1)                        |
| Missing data on bedtime or waking time                                                                                                                                                                                 | -1 (0.1)                         |
| Reported bedtime or waking time deviated $\geq 3$ SD from the population mean                                                                                                                                          | -25 (2.9)                        |
| Reported first or last meal time deviated $\geq 3$ SD from the population mean                                                                                                                                         | -19 (2.2)                        |
| Missing data on civil status                                                                                                                                                                                           | -8 (0.9)                         |
| Sleep midpoint deviated $\geq 3$ SD from the population mean                                                                                                                                                           | -7 (0.8)                         |
| Excluded because of pregnancy                                                                                                                                                                                          | -7 (0.8)                         |
| Respondent did not reside in Sweden                                                                                                                                                                                    | -6 (0.7)                         |
| BMI deviated $\geq 3$ SD from the population mean                                                                                                                                                                      | -3 (0.3)                         |
| Time of the first meal time was earlier than waking time                                                                                                                                                               | -59 (6.8)                        |
| <b>Final cohort</b>                                                                                                                                                                                                    | <b>191 (22.0%)</b>               |

**Table S2: Sleep and meal timing before and amid the COVID-19 pandemic, split by age.**

The median age (47 years) was used to divide subjects into young and old adults. Subjects of the old age group (n=98;  $\geq$ median age) had the following characteristics (mean, SD or %group): age, 57.4 (8.7); females/males, 75.3%/24.7%; and BMI, 26.0 (4.4). Subjects of the young age group (n=93; 79.6% females) were on average 36.5 (7.1) years old and had a mean BMI of 24.4 (4.8) kg/m<sup>2</sup>. Due to skewness of the data, comparisons between the time points were analyzed with the non-parametric Wilcoxon signed-rank test. A P-value smaller than 0.0013 was considered significant (Bonferroni corrected, shown in bold). Social jetlag was calculated by subtracting the sleep midpoint of work days from the free days' sleep midpoint. Eating jetlag was calculated by subtracting the meal midpoint of work days from the free days' meal midpoint.

| Age group | Parameter                     | Before<br>Mean (SD) | Amid<br>Mean (SD) | P-value          |
|-----------|-------------------------------|---------------------|-------------------|------------------|
| Young     | <b>Work days</b>              |                     |                   |                  |
|           | Bedtime (hh:mm)               | 22:37 (00:55)       | 22:55 (01:09)     | <b>0.001</b>     |
|           | Waking time (hh:mm)           | 06:21 (00:46)       | 06:33 (01:08)     | 0.018            |
|           | Sleep midpoint (hh:mm)        | 02:29 (00:45)       | 02:44 (01:00)     | <b>&lt;0.001</b> |
|           | Time in bed (hr.min)          | 7.43 (0.43)         | 7.38 (1.07)       | 0.317            |
|           | First meal (hh:mm)            | 07:30 (01:20)       | 07:56 (01:24)     | <b>&lt;0.001</b> |
|           | Last meal (hh:mm)             | 18:15 (00:57)       | 18:18 (01:04)     | 0.891            |
|           | Eating midpoint (hh:mm)       | 12:52 (00:49)       | 13:07 (00:58)     | <b>&lt;0.001</b> |
|           | Eating time window (hr.min)   | 10.46 (1.37)        | 10.21 (1.36)      | <b>&lt;0.001</b> |
|           | <b>Free days</b>              |                     |                   |                  |
|           | Bedtime (hh:mm)               | 23:21 (01:07)       | 23:23 (01:15)     | 0.622            |
|           | Waking time (hh:mm)           | 07:57 (01:26)       | 07:46 (01:33)     | 0.063            |
|           | Sleep midpoint (hh:mm)        | 03:39 (01:09)       | 03:34 (01:14)     | 0.302            |
|           | Time in bed (hr.min)          | 8.36 (1.11)         | 8.23 (1.21)       | 0.063            |
|           | First meal (hh:mm)            | 09:03 (01:35)       | 09:13 (01:27)     | 0.021            |
|           | Last meal (hh:mm)             | 18:36 (01:04)       | 18:40 (01:05)     | 0.493            |
|           | Eating midpoint (hh:mm)       | 13:50 (01:09)       | 13:56 (01:03)     | 0.041            |
|           | Eating time window (hr.min)   | 9.33 (1.27)         | 9.27 (1.26)       | 0.104            |
|           | <b>Social jetlag (hr.min)</b> | 1.12 (0.50)         | 0.50 (0.49)       | <b>&lt;0.001</b> |
|           | <b>Eating jetlag (hr.min)</b> | 0.57 (0.57)         | 0.50 (0.51)       | 0.531            |
| Old       | <b>Work days</b>              |                     |                   |                  |
|           | Bedtime (hh:mm)               | 22:42 (00:56)       | 22:51 (01:01)     | 0.044            |
|           | Waking time (hh:mm)           | 06:15 (01:04)       | 06:21 (01:08)     | 0.178            |
|           | Sleep midpoint (hh:mm)        | 02:28 (00:52)       | 02:36 (00:55)     | 0.038            |
|           | Time in bed (hr.min)          | 7.34 (1.01)         | 7.30 (1.09)       | 0.622            |
|           | First meal (hh:mm)            | 07:21 (01:12)       | 07:40 (01:18)     | <b>&lt;0.001</b> |

|                                |               |               |        |
|--------------------------------|---------------|---------------|--------|
| Last meal (hh:mm)              | 18:24 (01:00) | 18:25 (01:00) | 0.807  |
| Eating midpoint (hh:mm)        | 12:52 (00:50) | 13:02 (00:58) | <0.001 |
| Eating time window<br>(hr.min) | 11.03 (1.27)  | 10.45 (01:33) | <0.001 |

**Free days**

|                        |               |               |       |
|------------------------|---------------|---------------|-------|
| Bedtime (hh:mm)        | 23:14 (00:59) | 23:14 (01:11) | 0.765 |
| Waking time (hh:mm)    | 07:30 (01:03) | 07:22 (01:12) | 0.311 |
| Sleep midpoint (hh:mm) | 03:22 (00:54) | 03:18 (01:03) | 0.283 |
| Time in bed (hr.min)   | 8.16 (00:58)  | 8.09 (1.08)   | 0.371 |

|                                |               |               |       |
|--------------------------------|---------------|---------------|-------|
| First meal (hh:mm)             | 08:39 (01:05) | 08:46 (01:06) | 0.023 |
| Last meal (hh:mm)              | 18:39 (01:00) | 18:43 (01:00) | 0.119 |
| Eating midpoint (hh:mm)        | 13:39 (00:49) | 13:45 (00:50) | 0.013 |
| Eating time window<br>(hr.min) | 10.01 (01.17) | 9.57 (1.18)   | 0.531 |

|                               |             |             |        |
|-------------------------------|-------------|-------------|--------|
| <b>Social jetlag</b> (hr.min) | 0.55 (0.46) | 0.42 (0.45) | <0.001 |
|-------------------------------|-------------|-------------|--------|

|                               |             |             |       |
|-------------------------------|-------------|-------------|-------|
| <b>Eating jetlag</b> (hr.min) | 0.47 (0.48) | 0.44 (0.47) | 0.601 |
|-------------------------------|-------------|-------------|-------|

---

**Table S3: Sleep and meal timing before and amid the COVID-19 pandemic, split by gender.** Females (n=148) had the following characteristics (mean, SD or %group): age, 47.8 (13.5); and BMI, 25.0 (4.7). Male subjects of the young age group (n=43) were on average 45.2 (11.8) years old and had a mean BMI of 25.9 (4.5) kg/m<sup>2</sup>. Due to skewness of the data, comparisons between the time points were analyzed with the non-parametric Wilcoxon signed-rank test. A P-value smaller than 0.0013 was considered significant (Bonferroni corrected, shown in bold). Social jetlag was calculated by subtracting the sleep midpoint of work days from the free days' sleep midpoint. Eating jetlag was calculated by subtracting the meal midpoint of work days from the free days' meal midpoint.

| Gender  | Parameter                     | Before        | Amid          | P-value          |
|---------|-------------------------------|---------------|---------------|------------------|
|         |                               | Mean (SD)     | Mean (SD)     |                  |
| Females | <b>Work days</b>              |               |               |                  |
|         | Bedtime (hh:mm)               | 22:36 (00:57) | 22:48 (01:06) | <b>0.001</b>     |
|         | Waking time (hh:mm)           | 06:17 (00:57) | 06:26 (01:09) | 0.030            |
|         | Sleep midpoint (hh:mm)        | 02:26 (00:50) | 02:37 (00:59) | <b>&lt;0.001</b> |
|         | Time in bed (hr.min)          | 7.41 (0.55)   | 7.38 (1.06)   | 0.540            |
|         | First meal (hh:mm)            | 07:28 (01:17) | 07:53 (01:23) | <b>&lt;0.001</b> |
|         | Last meal (hh:mm)             | 18:21 (00:56) | 18:23 (00:57) | 0.373            |
|         | Eating midpoint (hh:mm)       | 12:55 (00:50) | 13:08 (00:54) | <b>&lt;0.001</b> |
|         | Eating time window (hr.min)   | 10.53 (1.31)  | 10.29 (1.33)  | <b>&lt;0.001</b> |
|         | <b>Free days</b>              |               |               |                  |
|         | Bedtime (hh:mm)               | 23:10 (01:02) | 23:09 (01:11) | 0.816            |
|         | Waking time (hh:mm)           | 07:41 (01:18) | 07:31 (01:27) | 0.091            |
|         | Sleep midpoint (hh:mm)        | 03:25 (01:03) | 03:20 (01:11) | 0.134            |
|         | Time in bed (hr.min)          | 8.30 (1.05)   | 8.22 (1.14)   | 0.142            |
|         | First meal (hh:mm)            | 08:50 (01:22) | 08:59 (01:14) | 0.013            |
|         | Last meal (hh:mm)             | 18:38(01:01)  | 18:41 (00:58) | 0.325            |
|         | Eating midpoint (hh:mm)       | 13:44 (00:59) | 13:50 (00:53) | 0.035            |
|         | Eating time window (hr.min)   | 9.48 (1.24)   | 9.43 (1.21)   | 0.145            |
|         | <b>Social jetlag (hr.min)</b> | 1.00 (0.47)   | 0.43 (0.46)   | <b>&lt;0.001</b> |
|         | <b>Eating jetlag (hr.min)</b> | 0.50 (0.51)   | 0.43 (0.46)   | 0.636            |
| Males   | <b>Work days</b>              |               |               |                  |
|         | Bedtime (hh:mm)               | 22:53 (00:45) | 23:10 (00:59) | 0.030            |
|         | Waking time (hh:mm)           | 06:20 (00:53) | 06:29 (01:07) | 0.078            |
|         | Sleep midpoint (hh:mm)        | 02:36 (00:40) | 02:49 (00:52) | 0.005            |
|         | Time in bed (hr.min)          | 7.27 (0.56)   | 7.19 (1.12)   | 0.363            |
|         | First meal (hh:mm)            | 07:15 (01:13) | 07:28 (01:13) | 0.036            |
|         | Last meal (hh:mm)             | 18:14 (01:09) | 18:15 (01:18) | 0.577            |
|         | Eating midpoint (hh:mm)       | 12:44 (00:51) | 12:52 (00:57) | 0.052            |

|                                |               |               |                  |
|--------------------------------|---------------|---------------|------------------|
| Eating time window<br>(hr.min) | 10.59 (1.39)  | 10.47 (1.40)  | 0.089            |
| <b>Free days</b>               |               |               |                  |
| Bedtime (hh:mm)                | 23:42 (01:01) | 23:48 (01:12) | 0.454            |
| Waking time (hh:mm)            | 07:51 (01:10) | 07:43 (01:09) | 0.306            |
| Sleep midpoint (hh:mm)         | 03:46 (00:58) | 03:45 (01:00) | 0.796            |
| Time in bed (hr.min)           | 8.08 (1.01)   | 7.55 (1.15)   | 0.177            |
| First meal (hh:mm)             | 08:51 (01:23) | 09:00 (01:30) | 0.008            |
| Last meal (hh:mm)              | 18:36 (01:04) | 18:44 (01:14) | 0.206            |
| Eating midpoint (hh:mm)        | 13:44 (01:02) | 13:52 (01:09) | 0.012            |
| Eating time window<br>(hr.min) | 9.45 (1.21)   | 9.44 (1.30)   | 0.259            |
| <b>Social jetlag</b> (hr.min)  | 1.13 (0.53)   | 0.56 (0.48)   | <b>&lt;0.001</b> |
| <b>Eating jetlag</b> (hr.min)  | 1.00 (0.58)   | 1.01 (0.57)   | 0.484            |

---

**Table S4: Sleep and meal timing before and amid the COVID-19 pandemic, split by BMI.**

Participants with either overweight or obesity (i.e.,  $\geq 25$  kg/m<sup>2</sup>; n=84) had the following characteristics (mean, SD or %group): age, 50.0 (12.7); females/males, 76.2%/23.8%; and BMI, 29.5 (3.6). Subjects with a BMI smaller than 25 kg/m<sup>2</sup> (n=107; 78.5 % females) were on average 45.0 (13.1) years old and had a mean BMI of 21.9 (1.9) kg/m<sup>2</sup>. Due to skewness of the data, comparisons between the time points were analyzed with the non-parametric Wilcoxon signed-rank test. A P-value smaller than 0.0013 was considered significant (Bonferroni corrected, shown in bold). Social jetlag was calculated by subtracting the sleep midpoint of work days from the free days' sleep midpoint. Eating jetlag was calculated by subtracting the meal midpoint of work days from the free days' meal midpoint.

| BMI                            | Parameter                      | Before<br>Mean (SD) | Amid<br>Mean (SD) | P-<br>value      |
|--------------------------------|--------------------------------|---------------------|-------------------|------------------|
| <25<br>kg/m <sup>2</sup>       | <b>Work days</b>               |                     |                   |                  |
|                                | Bedtime (hh:mm)                | 22:40 (00:53)       | 22:50 (01:02)     | 0.004            |
|                                | Waking time (hh:mm)            | 06:13 (00:48)       | 06:31 (01:02)     | <b>&lt;0.001</b> |
|                                | Sleep midpoint (hh:mm)         | 02:26 (00:43)       | 02:40 (00:52)     | <b>&lt;0.001</b> |
|                                | Time in bed (hr.min)           | 7.33 (0.52)         | 7.41 (1.05)       | 0.190            |
|                                | First meal (hh:mm)             | 07:22 (01:19)       | 07:45 (01:23)     | <b>&lt;0.001</b> |
|                                | Last meal (hh:mm)              | 18:20 (00:58)       | 18:23 (01:01)     | 0.498            |
|                                | Eating midpoint (hh:mm)        | 12:51 (00:50)       | 13:04 (00:56)     | <b>&lt;0.001</b> |
|                                | Eating time window<br>(hr.min) | 10.58 (1.36)        | 10.38 (1.33)      | <b>&lt;0.001</b> |
|                                | <b>Free days</b>               |                     |                   |                  |
|                                | Bedtime (hh:mm)                | 23:14 (00:56)       | 23:16 (01:10)     | 0.745            |
|                                | Waking time (hh:mm)            | 07:46 (01:13)       | 07:39 (01:19)     | 0.310            |
|                                | Sleep midpoint (hh:mm)         | 03:30 (00:56)       | 03:28 (01:04)     | 0.565            |
|                                | Time in bed (hr.min)           | 8.32 (1.05)         | 8.23 (1.15)       | 0.175            |
|                                | First meal (hh:mm)             | 08:48 (01:24)       | 09:01 (01:21)     | <b>&lt;0.001</b> |
|                                | Last meal (hh:mm)              | 18:34 (01:03)       | 18:38 (01:06)     | 0.300            |
|                                | Eating midpoint (hh:mm)        | 13:41 (01:00)       | 13:50 (00:59)     | 0.004            |
|                                | Eating time window<br>(hr.min) | 9.46 (1.27)         | 9.37 (1.27)       | 0.041            |
|                                | <b>Social jetlag (hr.min)</b>  | 1.06 (0.47)         | 0.48 (0.40)       | <b>&lt;0.001</b> |
|                                | <b>Eating jetlag (hr.min)</b>  | 0.50 (0.51)         | 0.47 (0.47)       | 0.880            |
| $\geq 25$<br>kg/m <sup>2</sup> | <b>Work days</b>               |                     |                   |                  |
|                                | Bedtime (hh:mm)                | 22:40 (00:59)       | 22:57 (01:09)     | 0.008            |
|                                | Waking time (hh:mm)            | 06:23 (01:05)       | 06:22 (01:16)     | 0.765            |
|                                | Sleep midpoint (hh:mm)         | 02:32 (00:54)       | 02:39 (01:03)     | 0.034            |
|                                | Time in bed (hr.min)           | 7.43 (1.00)         | 7.25 (1.11)       | 0.005            |

|                                |               |               |                  |
|--------------------------------|---------------|---------------|------------------|
| First meal (hh:mm)             | 07:29 (01:12) | 07:51 (01:20) | <b>&lt;0.001</b> |
| Last meal (hh:mm)              | 18:19 (01:01) | 18:19 (01:04) | 0.717            |
| Eating midpoint (hh:mm)        | 12:54 (00:50) | 13:05 (00:54) | 0.018            |
| Eating time window<br>(hr.min) | 10.50 (1.28)  | 10.28 (1.37)  | <b>0.001</b>     |

**Free days**

|                        |               |               |       |
|------------------------|---------------|---------------|-------|
| Bedtime (hh:mm)        | 23:21 (01:11) | 23:20 (01:17) | 0.690 |
| Waking time (hh:mm)    | 07:39 (01:21) | 07:26 (01:29) | 0.074 |
| Sleep midpoint (hh:mm) | 03:30 (01:09) | 03:23 (01:15) | 0.112 |
| Time in bed (hr.min)   | 8.17 (1.03)   | 8.07 (1.14)   | 0.163 |

|                                |               |               |       |
|--------------------------------|---------------|---------------|-------|
| First meal (hh:mm)             | 08:54 (01:20) | 08:56 (01:14) | 0.309 |
| Last meal (hh:mm)              | 18:42 (01:01) | 18:46 (00:58) | 0.189 |
| Eating midpoint (hh:mm)        | 13:48 (00:59) | 13:51 (00:53) | 0.142 |
| Eating time window<br>(hr.min) | 9.49 (1.18)   | 9.50 (1.18)   | 0.971 |

|                               |             |             |                  |
|-------------------------------|-------------|-------------|------------------|
| <b>Social jetlag</b> (hr.min) | 1.00 (0.51) | 0.44 (0.55) | <b>&lt;0.001</b> |
| <b>Eating jetlag</b> (hr.min) | 0.54 (0.56) | 0.47 (0.51) | 0.679            |

---
